# Supplementary material for: Crosslinking of Ly6a metabolically reprograms CD8 T cells for cancer immunotherapy
Source: PubMed Central journal article supplement — Nat Commun. 2024 Sep 27;15:8354. doi: 10.1038/s41467-024-52079-x (PMC11437002; doi:10.1038/s41467-024-52079-x), 2024-09-27
Supplement: 41467_2024_52079_MOESM3_ESM.pdf [file 41467_2024_52079_MOESM3_ESM.pdf]

## **Description of Additional Supplementary Files**

Supplementary Data 1: Antibodies used in CyTOF experiments.

Supplementary Data 2: Differentially expressed genes within CD8/CD4 clusters.

Supplementary Data 3: Gene expression in Ly6ahigh/negative T cells by single cell RNA-seq.

Supplementary Data 4: High-resolution mass spectrometry proteomic analysis of CD8+ T cells post anti-Ly6a antibody or IgG treatment in the presence or absence of melanoma cells.
